# Supplementary material
Source: publisher figshare collection journal article supplement (https://acs.figshare.com/ndownloader/files/18509318)
Supplement: Supplementary file 1 [file 18509318]

## Sheet: Residue_Naming
Residue	BMRB atom name	Hydrophobic/Hydrophilic	vdW Radius (Å)	Mass	Element
ALA	H	phil	1.2	1	H
ALA	HA	phob	1.2	1	H
ALA	HB1	phob	1.2	1	H
ALA	HB2	phob	1.2	1	H
ALA	HB3	phob	1.2	1	H
ALA	HN	phil	1.2	1	H
ALA	C	phob	1.7	6	C
ALA	CA	phob	1.7	6	C
ALA	CB	phob	1.7	6	C
ALA	N	phob	1.55	7	N
ALA	O	phil	1.52	8	O
ALA	H1	phil	1.2	1	H
ALA	H2	phil	1.2	1	H
ALA	H3	phil	1.2	1	H
ALA	H''	phil	1.2	1	H
ALA	O'	phil	1.52	8	O
ALA	O''	phil	1.52	8	O
ARG	H	phil	1.2	1	H
ARG	HA	phob	1.2	1	H
ARG	HB2	phob	1.2	1	H
ARG	HB3	phob	1.2	1	H
ARG	HG2	phob	1.2	1	H
ARG	HG3	phob	1.2	1	H
ARG	HD2	phob	1.2	1	H
ARG	HD3	phob	1.2	1	H
ARG	HE	phob	1.2	1	H
ARG	HN	phil	1.2	1	H
ARG	HH11	phil	1.2	1	H
ARG	HH12	phil	1.2	1	H
ARG	HH21	phil	1.2	1	H
ARG	HH22	phil	1.2	1	H
ARG	1HH1	phil	1.2	1	H
ARG	2HH1	phil	1.2	1	H
ARG	1HH2	phil	1.2	1	H
ARG	2HH2	phil	1.2	1	H
ARG	C	phob	1.7	6	C
ARG	CA	phob	1.7	6	C
ARG	CB	phob	1.7	6	C
ARG	CG	phob	1.7	6	C
ARG	CD	phob	1.7	6	C
ARG	CZ	phob	1.7	6	C
ARG	N	phob	1.55	7	N
ARG	NE	phob	1.55	7	N
ARG	NH1	phil	1.55	7	N
ARG	NH2	phil	1.55	7	N
ARG	O	phil	1.52	8	O
ARG	H1	phil	1.2	1	H
ARG	H2	phil	1.2	1	H
ARG	H3	phil	1.2	1	H
ARG	H''	phil	1.2	1	H
ARG	O'	phil	1.52	8	O
ARG	O''	phil	1.52	8	O
ASP	H	phil	1.2	1	H
ASP	HA	phob	1.2	1	H
ASP	HB2	phob	1.2	1	H
ASP	HB3	phob	1.2	1	H
ASP	HD2	phil	1.2	1	H
ASP	C	phob	1.7	6	C
ASP	CA	phob	1.7	6	C
ASP	CB	phob	1.7	6	C
ASP	CG	phob	1.7	6	C
ASP	HN	phil	1.2	1	H
ASP	N	phob	1.55	7	N
ASP	O	phil	1.52	8	O
ASP	OD1	phil	1.52	8	O
ASP	OD2	phil	1.52	8	O
ASP	H1	phil	1.2	1	H
ASP	H2	phil	1.2	1	H
ASP	H3	phil	1.2	1	H
ASP	H''	phil	1.2	1	H
ASP	O'	phil	1.52	8	O
ASP	O''	phil	1.52	8	O
ASN	H	phil	1.2	1	H
ASN	HA	phob	1.2	1	H
ASN	HB2	phob	1.2	1	H
ASN	HB3	phob	1.2	1	H
ASN	HN	phil	1.2	1	H
ASN	HD21	phil	1.2	1	H
ASN	HD22	phil	1.2	1	H
ASN	1HD2	phil	1.2	1	H
ASN	2HD2	phil	1.2	1	H
ASN	C	phob	1.7	6	C
ASN	CA	phob	1.7	6	C
ASN	CB	phob	1.7	6	C
ASN	CG	phob	1.7	6	C
ASN	N	phob	1.55	7	N
ASN	ND2	phob	1.55	7	N
ASN	O	phil	1.52	8	O
ASN	OD1	phil	1.52	8	O
ASN	H1	phil	1.2	1	H
ASN	H2	phil	1.2	1	H
ASN	H3	phil	1.2	1	H
ASN	H''	phil	1.2	1	H
ASN	O'	phil	1.52	8	O
ASN	O''	phil	1.52	8	O
CYS	H	phil	1.2	1	H
CYS	HA	phob	1.2	1	H
CYS	HB2	phob	1.2	1	H
CYS	HB3	phob	1.2	1	H
CYS	HG	phil	1.2	1	H
CYS	C	phob	1.7	6	C
CYS	CA	phob	1.7	6	C
CYS	CB	phob	1.7	6	C
CYS	HN	phil	1.2	1	H
CYS	N	phob	1.55	7	N
CYS	O	phil	1.52	8	O
CYS	SG	phil	1.8	16	S
CYS	H1	phil	1.2	1	H
CYS	H2	phil	1.2	1	H
CYS	H3	phil	1.2	1	H
CYS	H''	phil	1.2	1	H
CYS	O'	phil	1.52	8	O
CYS	O''	phil	1.52	8	O
GLU	H	phil	1.2	1	H
GLU	HA	phob	1.2	1	H
GLU	HB2	phob	1.2	1	H
GLU	HB3	phob	1.2	1	H
GLU	HG2	phob	1.2	1	H
GLU	HG3	phob	1.2	1	H
GLU	HE2	phil	1.2	1	H
GLU	C	phob	1.7	6	C
GLU	CA	phob	1.7	6	C
GLU	CB	phob	1.7	6	C
GLU	CG	phob	1.7	6	C
GLU	CD	phob	1.7	6	C
GLU	HN	phil	1.2	1	H
GLU	N	phob	1.55	7	N
GLU	O	phil	1.52	8	O
GLU	OE1	phil	1.52	8	O
GLU	OE2	phil	1.52	8	O
GLU	H1	phil	1.2	1	H
GLU	H2	phil	1.2	1	H
GLU	H3	phil	1.2	1	H
GLU	H''	phil	1.2	1	H
GLU	O'	phil	1.52	8	O
GLU	O''	phil	1.52	8	O
GLN	H	phil	1.2	1	H
GLN	HA	phob	1.2	1	H
GLN	HB2	phob	1.2	1	H
GLN	HB3	phob	1.2	1	H
GLN	HG2	phob	1.2	1	H
GLN	HG3	phob	1.2	1	H
GLN	HN	phil	1.2	1	H
GLN	HE21	phil	1.2	1	H
GLN	HE22	phil	1.2	1	H
GLN	1HE2	phil	1.2	1	H
GLN	2HE2	phil	1.2	1	H
GLN	C	phob	1.7	6	C
GLN	CA	phob	1.7	6	C
GLN	CB	phob	1.7	6	C
GLN	CG	phob	1.7	6	C
GLN	CD	phob	1.7	6	C
GLN	N	phob	1.55	7	N
GLN	NE2	phob	1.55	7	N
GLN	O	phil	1.52	8	O
GLN	OE1	phil	1.52	8	O
GLN	H1	phil	1.2	1	H
GLN	H2	phil	1.2	1	H
GLN	H3	phil	1.2	1	H
GLN	H''	phil	1.2	1	H
GLN	O'	phil	1.52	8
GLN	O''	phil	1.52	8
GLY	H	phil	1.2	1	H
GLY	HA2	phob	1.2	1	H
GLY	HA3	phob	1.2	1	H
GLY	C	phob	1.7	6	C
GLY	CA	phob	1.7	6	C
GLY	HN	phil	1.2	1	H
GLY	N	phob	1.55	7	N
GLY	O	phil	1.52	8	O
GLY	H1	phil	1.2	1	H
GLY	H2	phil	1.2	1	H
GLY	H3	phil	1.2	1	H
GLY	H''	phil	1.2	1	H
GLY	O'	phil	1.52	8	O
GLY	O''	phil	1.52	8	O
HIE	N	phob	1.55	7	N
HIE	H	phil	1.2	1	H
HIE	CA	phob	1.7	6	C
HIE	HA	phob	1.2	1	H
HIE	CB	phob	1.7	6	C
HIE	HB2	phob	1.2	1	H
HIE	HB3	phob	1.2	1	H
HIE	CG	phob	1.7	6	C
HIE	ND1	phil	1.55	7	N
HIE	CE1	phob	1.7	6	C
HIE	HE1	phob	1.2	1	H
HIE	NE2	phil	1.55	7	N
HIE	HE2	phil	1.2	1	H
HIE	CD2	phob	1.7	6	C
HIE	HD2	phob	1.2	1	H
HIE	H''	phil	1.2	1	H
HIE	O'	phil	1.52	8	O
HIE	O''	phil	1.52	8	O
HID	N	phob	1.55	7	N
HID	H	phil	1.2	1	H
HID	CA	phob	1.7	6	C
HID	HA	phob	1.2	1	H
HID	CB	phob	1.7	6	C
HID	HB2	phob	1.2	1	H
HID	HB3	phob	1.2	1	H
HID	CG	phob	1.7	6	C
HID	ND1	phil	1.55	7	N
HID	HD1	phil	1.2	1	H
HID	CE1	phob	1.7	6	C
HID	HE1	phob	1.2	1	H
HID	NE2	phil	1.55	7	N
HID	CD2	phob	1.7	6	C
HID	HD2	phob	1.2	1	H
HID	H''	phil	1.2	1	H
HID	O'	phil	1.52	8	O
HID	O''	phil	1.52	8	O
HIS	H	phil	1.2	1	H
HIS	HA	phob	1.2	1	H
HIS	HB2	phob	1.2	1	H
HIS	HB3	phob	1.2	1	H
HIS	HD1	phil	1.2	1	H
HIS	HD2	phob	1.2	1	H
HIS	HE1	phob	1.2	1	H
HIS	HE2	phil	1.2	1	H
HIS	C	phob	1.7	6	C
HIS	CA	phob	1.7	6	C
HIS	CB	phob	1.7	6	C
HIS	CG	phob	1.7	6	C
HIS	CD2	phob	1.7	6	C
HIS	CE1	phob	1.7	6	C
HIS	HN	phil	1.2	1	H
HIS	N	phob	1.55	7	N
HIS	ND1	phil	1.55	7	N
HIS	NE2	phil	1.55	7	N
HIS	O	phil	1.52	8	O
HIS	H1	phil	1.2	1	H
HIS	H2	phil	1.2	1	H
HIS	H3	phil	1.2	1	H
HIS	H''	phil	1.2	1	H
HIS	O'	phil	1.52	8	O
HIS	O''	phil	1.52	8	O
ILE	H	phil	1.2	1	H
ILE	HA	phob	1.2	1	H
ILE	HB	phob	1.2	1	H
ILE	HN	phil	1.2	1	H
ILE	HG12	phob	1.2	1	H
ILE	HG13	phob	1.2	1	H
ILE	HG21	phob	1.2	1	H
ILE	HG22	phob	1.2	1	H
ILE	HG23	phob	1.2	1	H
ILE	HD11	phob	1.2	1	H
ILE	HD12	phob	1.2	1	H
ILE	HD13	phob	1.2	1	H
ILE	C	phob	1.7	6	C
ILE	CA	phob	1.7	6	C
ILE	CB	phob	1.7	6	C
ILE	CG1	phob	1.7	6	C
ILE	CG2	phob	1.7	6	C
ILE	CD1	phob	1.7	6	C
ILE	N	phob	1.55	7	N
ILE	O	phil	1.52	8	O
ILE	H1	phil	1.2	1	H
ILE	H2	phil	1.2	1	H
ILE	H3	phil	1.2	1	H
ILE	H''	phil	1.2	1	H
ILE	O'	phil	1.52	8	O
ILE	O''	phil	1.52	8	O
LEU	H	phil	1.2	1	H
LEU	HA	phob	1.2	1	H
LEU	HB2	phob	1.2	1	H
LEU	HB3	phob	1.2	1	H
LEU	HG	phob	1.2	1	H
LEU	HN	phil	1.2	1	H
LEU	HD11	phob	1.2	1	H
LEU	HD12	phob	1.2	1	H
LEU	HD13	phob	1.2	1	H
LEU	HD21	phob	1.2	1	H
LEU	HD22	phob	1.2	1	H
LEU	HD23	phob	1.2	1	H
LEU	C	phob	1.7	6	C
LEU	CA	phob	1.7	6	C
LEU	CB	phob	1.7	6	C
LEU	CG	phob	1.7	6	C
LEU	CD1	phob	1.7	6	C
LEU	CD2	phob	1.7	6	C
LEU	N	phob	1.55	7	N
LEU	O	phil	1.52	8	O
LEU	H1	phil	1.2	1	H
LEU	H2	phil	1.2	1	H
LEU	H3	phil	1.2	1	H
LEU	H''	phil	1.2	1	H
LEU	O'	phil	1.52	8	O
LEU	O''	phil	1.52	8	O
LYS	H	phil	1.2	1	H
LYS	HA	phob	1.2	1	H
LYS	HB2	phob	1.2	1	H
LYS	HB3	phob	1.2	1	H
LYS	HG2	phob	1.2	1	H
LYS	HG3	phob	1.2	1	H
LYS	HD2	phob	1.2	1	H
LYS	HD3	phob	1.2	1	H
LYS	HE2	phob	1.2	1	H
LYS	HE3	phob	1.2	1	H
LYS	HZ1	phil	1.2	1	H
LYS	HZ2	phil	1.2	1	H
LYS	HZ3	phil	1.2	1	H
LYS	C	phob	1.7	6	C
LYS	CA	phob	1.7	6	C
LYS	CB	phob	1.7	6	C
LYS	CG	phob	1.7	6	C
LYS	CD	phob	1.7	6	C
LYS	CE	phob	1.7	6	C
LYS	HN	phil	1.2	1	H
LYS	N	phob	1.55	7	N
LYS	NZ	phil	1.55	7	N
LYS	O	phil	1.52	8	O
LYS	H1	phil	1.2	1	H
LYS	H2	phil	1.2	1	H
LYS	H3	phil	1.2	1	H
LYS	H''	phil	1.2	1	H
LYS	O'	phil	1.52	8	O
LYS	O''	phil	1.52	8	O
MET	H	phil	1.2	1	H
MET	HA	phob	1.2	1	H
MET	HB2	phob	1.2	1	H
MET	HB3	phob	1.2	1	H
MET	HG2	phob	1.2	1	H
MET	HG3	phob	1.2	1	H
MET	HE1	phob	1.2	1	H
MET	HE2	phob	1.2	1	H
MET	HE3	phob	1.2	1	H
MET	C	phob	1.7	6	C
MET	CA	phob	1.7	6	C
MET	CB	phob	1.7	6	C
MET	CG	phob	1.7	6	C
MET	CE	phob	1.7	6	C
MET	HN	phil	1.2	1	H
MET	N	phob	1.55	7	N
MET	O	phil	1.52	8	O
MET	SD	phil	1.8	16	S
MET	H1	phil	1.2	1	H
MET	H2	phil	1.2	1	H
MET	H3	phil	1.2	1	H
MET	H''	phil	1.2	1	H
MET	O'	phil	1.52	8	O
MET	O''	phil	1.52	8	O
PHE	H	phil	1.2	1	H
PHE	HA	phob	1.2	1	H
PHE	HB2	phob	1.2	1	H
PHE	HB3	phob	1.2	1	H
PHE	HD1	phob	1.2	1	H
PHE	HD2	phob	1.2	1	H
PHE	HE1	phob	1.2	1	H
PHE	HE2	phob	1.2	1	H
PHE	HZ	phob	1.2	1	H
PHE	C	phob	1.7	6	C
PHE	CA	phob	1.7	6	C
PHE	CB	phob	1.7	6	C
PHE	CG	phob	1.7	6	C
PHE	CD1	phob	1.7	6	C
PHE	CD2	phob	1.7	6	C
PHE	CE1	phob	1.7	6	C
PHE	CE2	phob	1.7	6	C
PHE	CZ	phob	1.7	6	C
PHE	HN	phil	1.2	1	H
PHE	N	phob	1.55	7	N
PHE	O	phil	1.52	8	O
PHE	H1	phil	1.2	1	H
PHE	H2	phil	1.2	1	H
PHE	H3	phil	1.2	1	H
PHE	H''	phil	1.2	1	H
PHE	O'	phil	1.52	8	O
PHE	O''	phil	1.52	8	O
PRO	HA	phob	1.2	1	H
PRO	HB2	phob	1.2	1	H
PRO	HB3	phob	1.2	1	H
PRO	HG2	phob	1.2	1	H
PRO	HG3	phob	1.2	1	H
PRO	HD2	phob	1.2	1	H
PRO	HD3	phob	1.2	1	H
PRO	C	phob	1.7	6	C
PRO	CA	phob	1.7	6	C
PRO	CB	phob	1.7	6	C
PRO	CG	phob	1.7	6	C
PRO	CD	phob	1.7	6	C
PRO	HN	phil	1.2	1	H
PRO	N	phob	1.55	7	N
PRO	O	phil	1.52	8	O
PRO	H1	phil	1.2	1	H
PRO	H2	phil	1.2	1	H
PRO	H3	phil	1.2	1	H
PRO	H''	phil	1.2	1	H
PRO	O'	phil	1.52	8	O
PRO	O''	phil	1.52	8	O
PRO	H	phob	1.2	1	H
SER	H	phil	1.2	1	H
SER	HA	phob	1.2	1	H
SER	HB2	phob	1.2	1	H
SER	HB3	phob	1.2	1	H
SER	HG	phil	1.2	1	H
SER	C	phob	1.7	6	C
SER	CA	phob	1.7	6	C
SER	CB	phob	1.7	6	C
SER	HN	phil	1.2	1	H
SER	N	phob	1.55	7	N
SER	O	phil	1.52	8	O
SER	OG	phil	1.52	8	O
SER	H1	phil	1.2	1	H
SER	H2	phil	1.2	1	H
SER	H3	phil	1.2	1	H
SER	H''	phil	1.2	1	H
SER	O'	phil	1.52	8	O
SER	O''	phil	1.52	8	O
THR	H	phil	1.2	1	H
THR	HA	phob	1.2	1	H
THR	HB	phob	1.2	1	H
THR	HG1	phil	1.2	1	H
THR	HN	phil	1.2	1	H
THR	HG21	phob	1.2	1	H
THR	HG22	phob	1.2	1	H
THR	HG23	phob	1.2	1	H
THR	C	phob	1.7	6	C
THR	CA	phob	1.7	6	C
THR	CB	phob	1.7	6	C
THR	CG2	phob	1.7	6	C
THR	N	phob	1.55	7	N
THR	O	phil	1.52	8	O
THR	OG1	phil	1.52	8	O
THR	H1	phil	1.2	1	H
THR	H2	phil	1.2	1	H
THR	H3	phil	1.2	1	H
THR	H''	phil	1.2	1	H
THR	O'	phil	1.52	8	O
THR	O''	phil	1.52	8	O
TRP	H	phil	1.2	1	H
TRP	HA	phob	1.2	1	H
TRP	HB2	phob	1.2	1	H
TRP	HB3	phob	1.2	1	H
TRP	HD1	phob	1.2	1	H
TRP	HE1	phil	1.2	1	H
TRP	HE3	phob	1.2	1	H
TRP	HZ2	phob	1.2	1	H
TRP	HZ3	phob	1.2	1	H
TRP	HH2	phob	1.2	1	H
TRP	C	phob	1.7	6	C
TRP	CA	phob	1.7	6	C
TRP	CB	phob	1.7	6	C
TRP	CG	phob	1.7	6	C
TRP	CD1	phob	1.7	6	C
TRP	CD2	phob	1.7	6	C
TRP	CE2	phob	1.7	6	C
TRP	CE3	phob	1.7	6	C
TRP	CZ2	phob	1.7	6	C
TRP	CZ3	phob	1.7	6	C
TRP	CH2	phob	1.7	6	C
TRP	HN	phil	1.2	1	H
TRP	N	phob	1.55	7	N
TRP	NE1	phob	1.55	7	N
TRP	O	phil	1.52	8	O
TRP	H1	phil	1.2	1	H
TRP	H2	phil	1.2	1	H
TRP	H3	phil	1.2	1	H
TRP	H''	phil	1.2	1	H
TRP	O'	phil	1.52	8	O
TRP	O''	phil	1.52	8	O
TYR	H	phil	1.2	1	H
TYR	HA	phob	1.2	1	H
TYR	HB2	phob	1.2	1	H
TYR	HB3	phob	1.2	1	H
TYR	HD1	phob	1.2	1	H
TYR	HD2	phob	1.2	1	H
TYR	HE1	phob	1.2	1	H
TYR	HE2	phob	1.2	1	H
TYR	HH	phil	1.2	1	H
TYR	C	phob	1.7	6	C
TYR	CA	phob	1.7	6	C
TYR	CB	phob	1.7	6	C
TYR	CG	phob	1.7	6	C
TYR	CD1	phob	1.7	6	C
TYR	CD2	phob	1.7	6	C
TYR	CE1	phob	1.7	6	C
TYR	CE2	phob	1.7	6	C
TYR	CZ	phob	1.7	6	C
TYR	HN	phil	1.2	1	H
TYR	N	phob	1.55	7	N
TYR	O	phil	1.52	8	O
TYR	OH	phil	1.52	8	O
TYR	H1	phil	1.2	1	H
TYR	H2	phil	1.2	1	H
TYR	H3	phil	1.2	1	H
TYR	H''	phil	1.2	1	H
TYR	O'	phil	1.52	8	O
TYR	O''	phil	1.52	8	O
VAL	H	phil	1.2	1	H
VAL	HA	phob	1.2	1	H
VAL	HB	phob	1.2	1	H
VAL	HG11	phob	1.2	1	H
VAL	HG12	phob	1.2	1	H
VAL	HG13	phob	1.2	1	H
VAL	HG21	phob	1.2	1	H
VAL	HG22	phob	1.2	1	H
VAL	HG23	phob	1.2	1	H
VAL	C	phob	1.7	6	C
VAL	CA	phob	1.7	6	C
VAL	CB	phob	1.7	6	C
VAL	CG1	phob	1.7	6	C
VAL	CG2	phob	1.7	6	C
VAL	HN	phil	1.2	1	H
VAL	N	phob	1.55	7	N
VAL	O	phil	1.52	8	O
VAL	H1	phil	1.2	1	H
VAL	H2	phil	1.2	1	H
VAL	H3	phil	1.2	1	H
VAL	H''	phil	1.2	1	H
VAL	O'	phil	1.52	8	O
VAL	O''	phil	1.52	8	O
Ar	Ar	phob	1.88	18	Ar
Ne	Ne	phob	1.54	10	Ne
He	He	phob	1.4	2	He
Kr	Kr	phob	2.02	36	Kr
Xe	Xe	phob	2.16	54	Xe
